# Supplementary material for: Novel Fe3O4/HNT@rGO composite via a facile co-precipitation method for the removal of contaminants from aqueous system
Source: Royal Society of Chemistry journal article supplement (doi:10.1039/c6ra01279e), 2016-01-01
Supplement: c6ra01279e1.pdf [file c6ra01279e1.pdf]

**Electronic Supplementary Information (ESI) for  
Novel Fe<sub>3</sub>O<sub>4</sub>/HNT@rGO composite via a facile co-precipitation  
method for the removal of contaminants from aqueous system**

*Chengwei Gao,<sup>a</sup> Baojun Li,<sup>a</sup> Ning Chen,<sup>a</sup> Jie Ding,<sup>\*,a</sup> Qiang Cai,<sup>b</sup> Jianmin Zhang<sup>a</sup>  
and Yushan Liu,<sup>\*,a</sup>*

<sup>a</sup> College of Chemistry and Molecular Engineering, Zhengzhou University, 100  
Science Road, Zhengzhou 450001, P R China

<sup>b</sup> Key Laboratory for Advanced Materials of Ministry of Education and College of  
Materials Science and Engineering, Tsinghua University, Beijing 100084, PR China

\*Corresponding author. E-mail: liuyushan@zzu.edu.cn and jieding@zzu.edu.cn

**Experimental section**

*Synthesis of graphene oxide.*

Graphene oxide (GO) was synthesized using the following modified Hummer's method.<sup>S1</sup> Graphite (2 g) was mixed with concentrated H<sub>2</sub>SO<sub>4</sub> (69 mL) and the mixture was stirred for 30 min within an ice bath. KMnO<sub>4</sub> (8 g) was added very slowly into the dark suspension and the reaction mixture was stirred and sonicated for another 15 min under a reaction temperature of 20 °C. Then the ice bath was removed, and the mixture was stirred at 35 °C overnight. Distilled water was added to the pasty solution under magnetic stirring and the color of the solution turned to yellowish brown. After another 2 h of vigorous stirring, H<sub>2</sub>O<sub>2</sub> (30wt %, 25 mL) was added and the color turned golden yellow immediately. The mixture was washed with HCl (5 %) for several times and then deionized water until the solution became acid free. The

reaction mixture was filtered and dried under vacuum at 65 °C. The GO was obtained as a gray powder and used for the further experimental.

| Samples | GO<br>(g) | HNT<br>(g) | FeCl <sub>3</sub> ·6H <sub>2</sub> O<br>(g) | FeSO <sub>4</sub> ·7H <sub>2</sub> O<br>(g) | NH <sub>4</sub> OH<br>(mL) | FHGC | Yield |
|---------|-----------|------------|---------------------------------------------|---------------------------------------------|----------------------------|------|-------|
| FHGC-1  | 0.8       | 0.8        | 2.0                                         | 1.22                                        | 24                         | 1.8  | 79%   |
| FHGC-2  | 0.8       | 0.8        | 1.0                                         | 0.61                                        | 24                         | 1.5  | 73%   |
| FHGC-3  | 0.8       | 0.8        | 0.5                                         | 0.31                                        | 24                         | 1.2  | 67%   |

**Table S1** Preparation conditions for the FHGC nanocomposites.

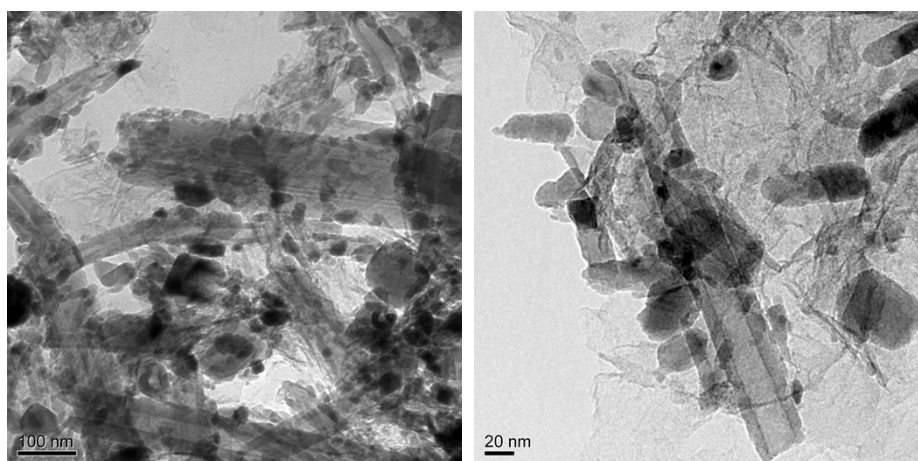

(a)

(b)

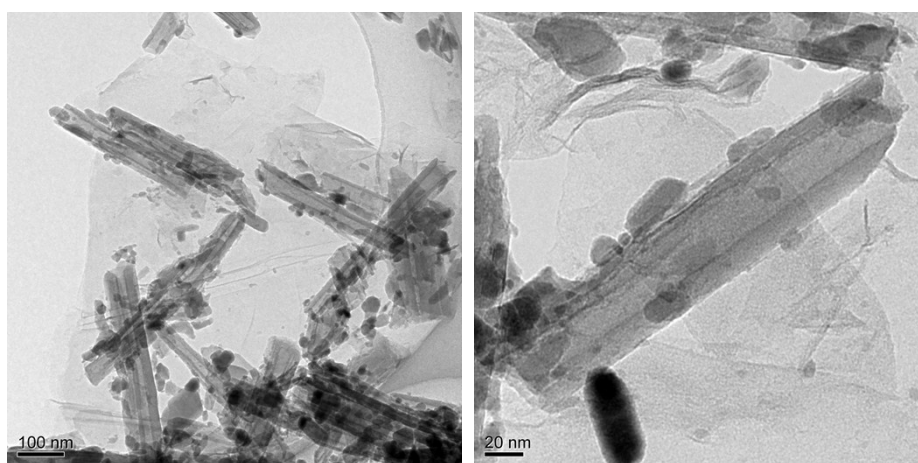

(c)

(d)

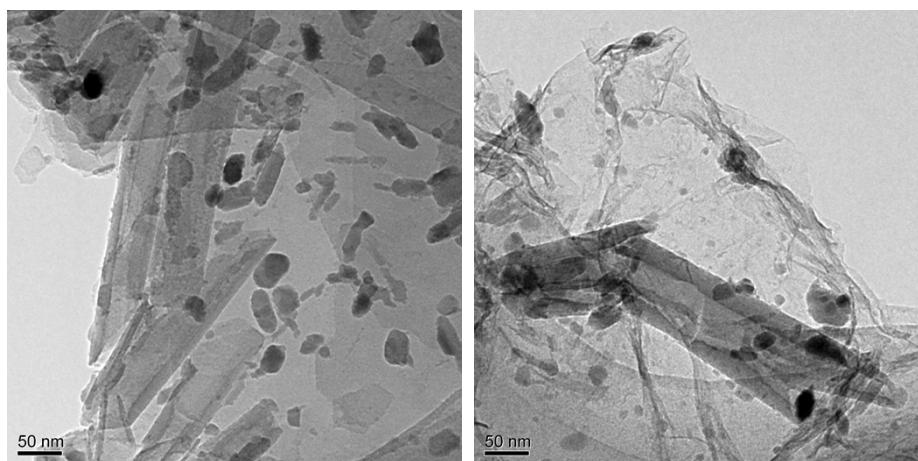

(e)

(f)

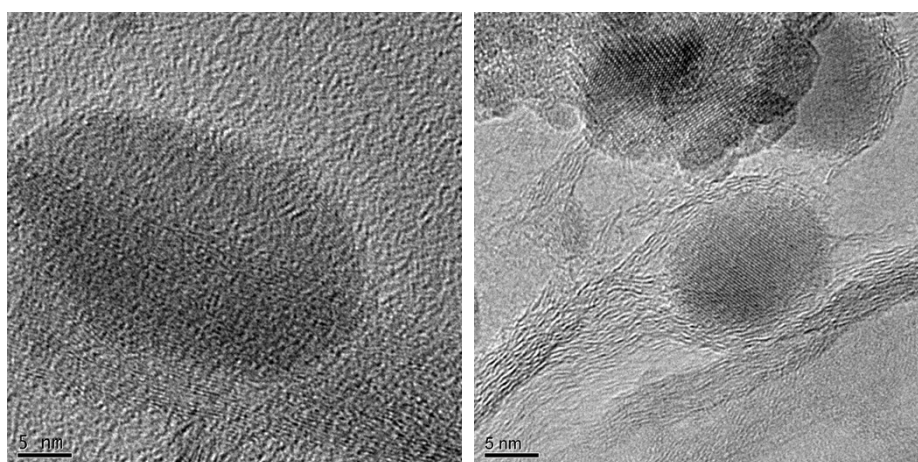

(g)

(h)

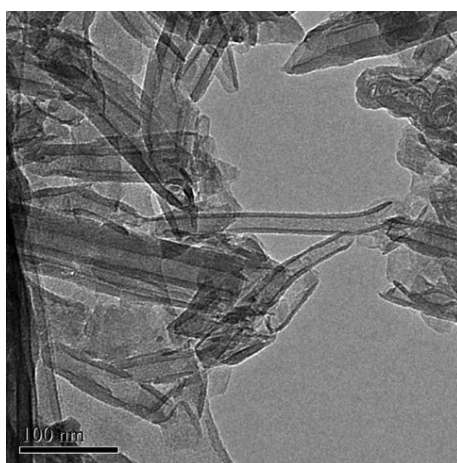

(i)

**Fig. S1.** (a) and (b)TEM images of FHGC-1; (c) and (d)TEM images of FHGC-2; (e) and (f)TEM images of FHGC-3; (g) TEM image of  $\text{Fe}_3\text{O}_4$  on HNT; (h) HRTEM image of  $\text{Fe}_3\text{O}_4$  on rGO sheets; (i) TEM image of raw HNT.

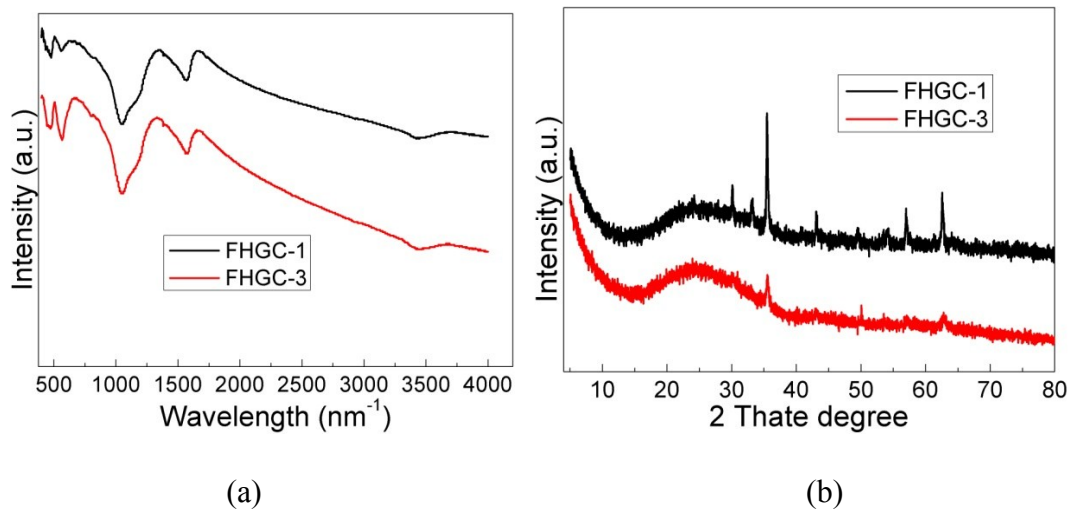

**Fig. S2.** (a) FT-IR spectra of FHGC-1 and FHGC-3; (b) XRD patterns of FHGC-1 and FHGC-3.

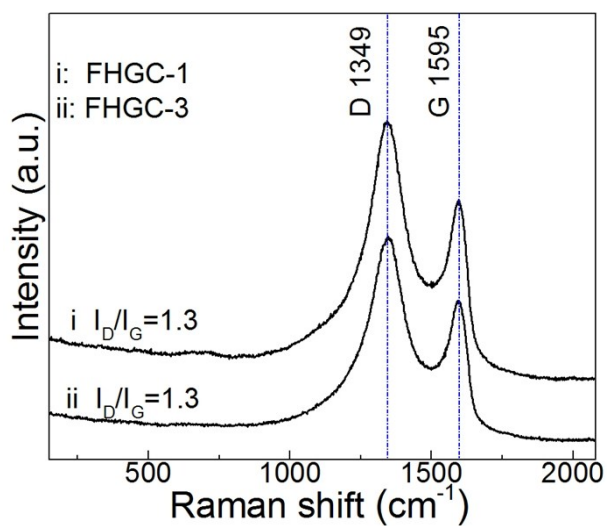

**Fig. S3.** Raman spectra of FHGC-1 and FHGC-3.

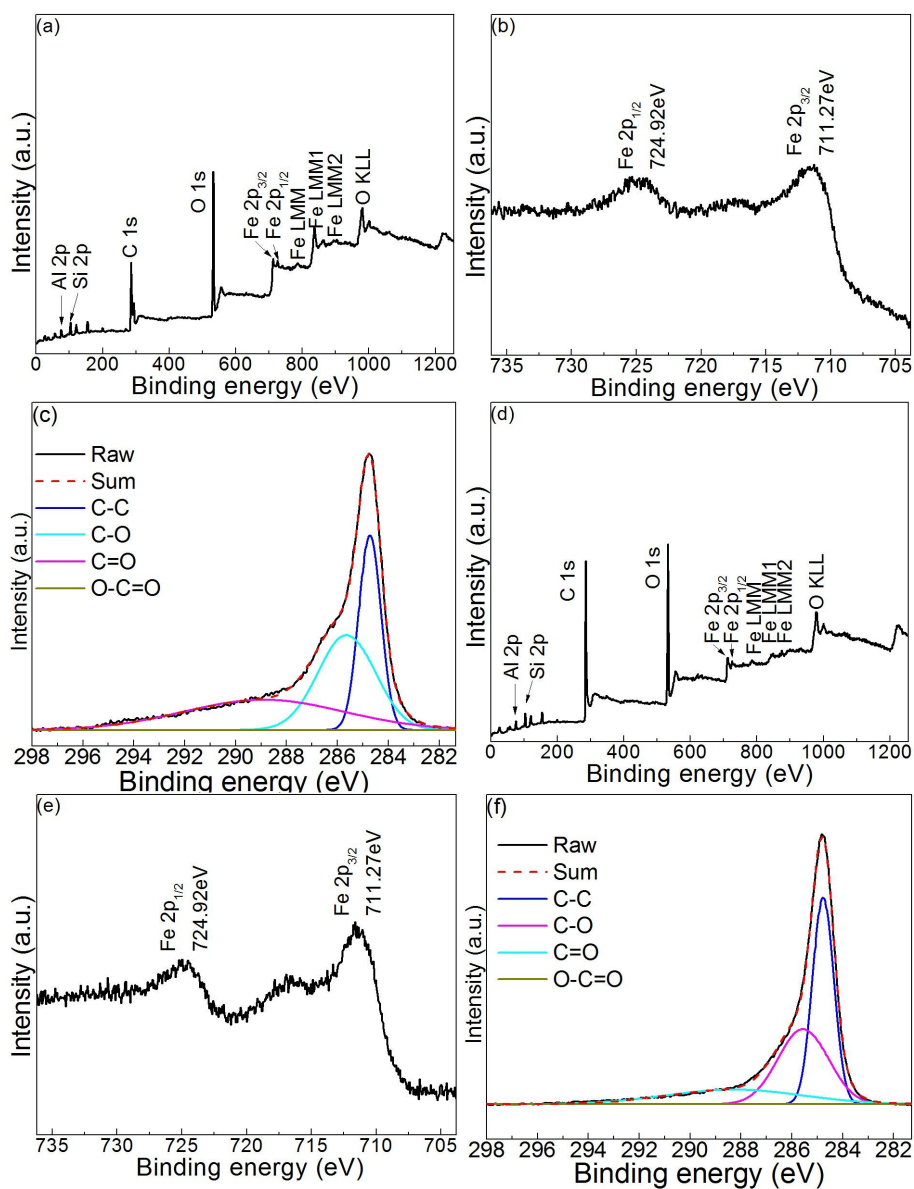

**Fig. S4.** (a) and (d) XPS spectra of FHGC-1 and FHGC-3; (b) and (e) is the high spectra of Fe of FHGC-1 and FHGC-3; (c) and (f) is the high spectra of C 1s of FHGC-1 and FHGC-3.

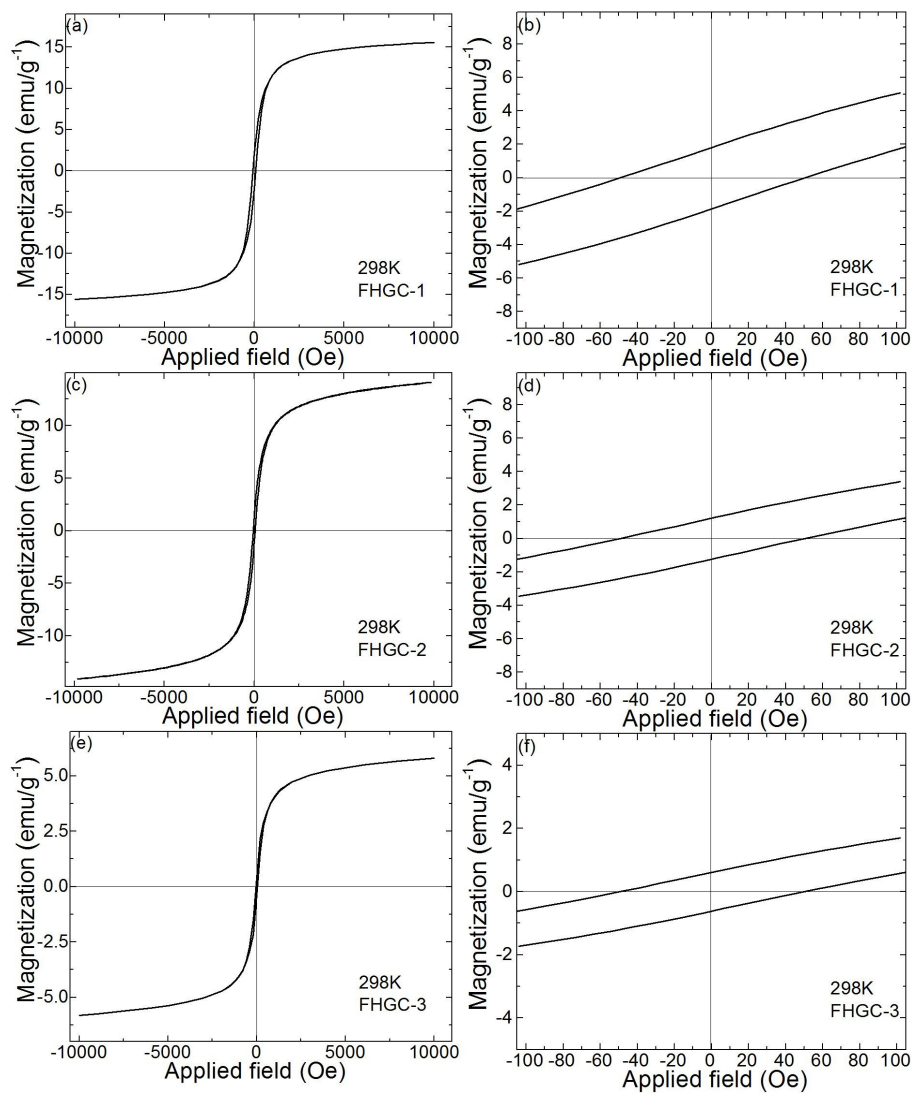

**Fig. S5** (a) and (b) Magnetization curves for the FHGC-1, (c) and (d) Magnetization curves for the FHGC-2, (e) and (f) Magnetization curves for the FHGC-3.

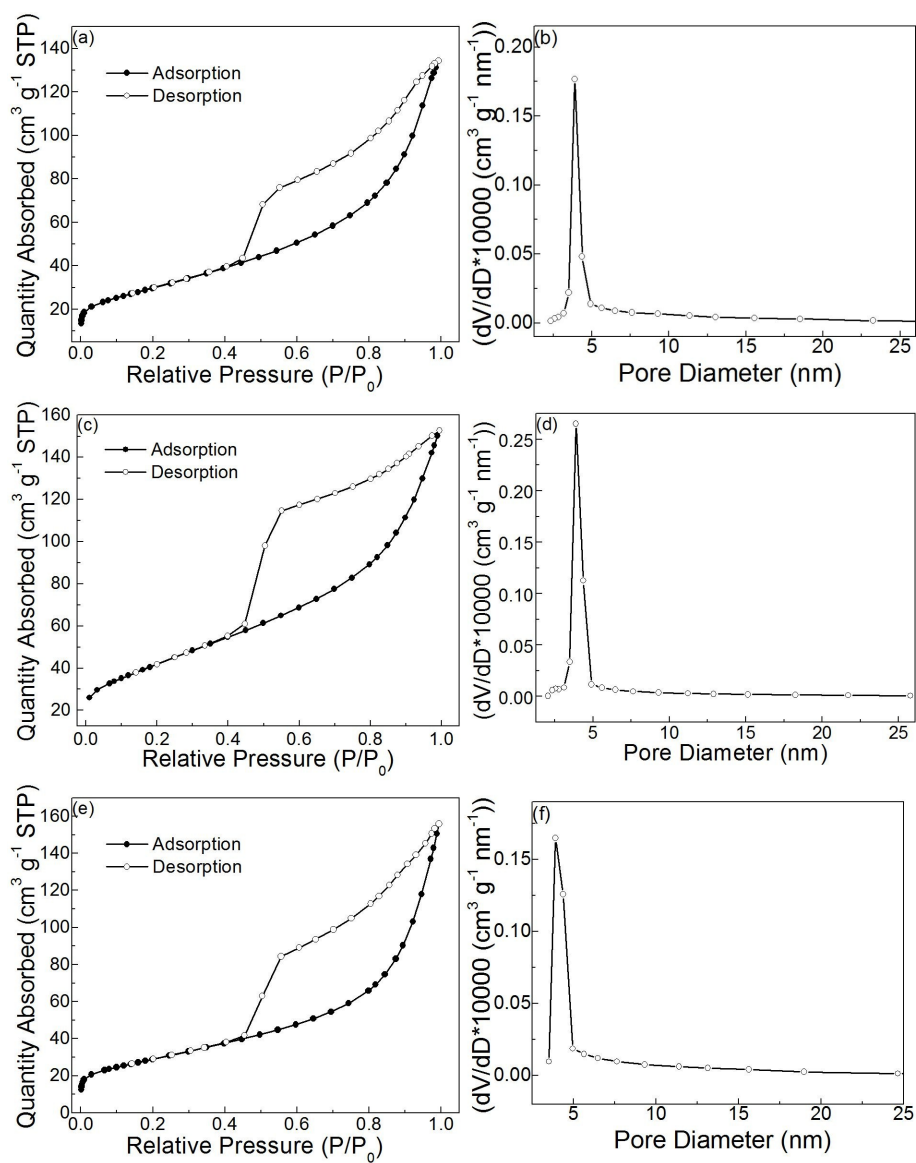

**Fig. S6.** (a), (c) and (e) Nitrogen adsorption desorption isotherms at 77K and (b), (d) and (f) pore width distribution of FHGC-1, FHGC-2, FHGC-3.

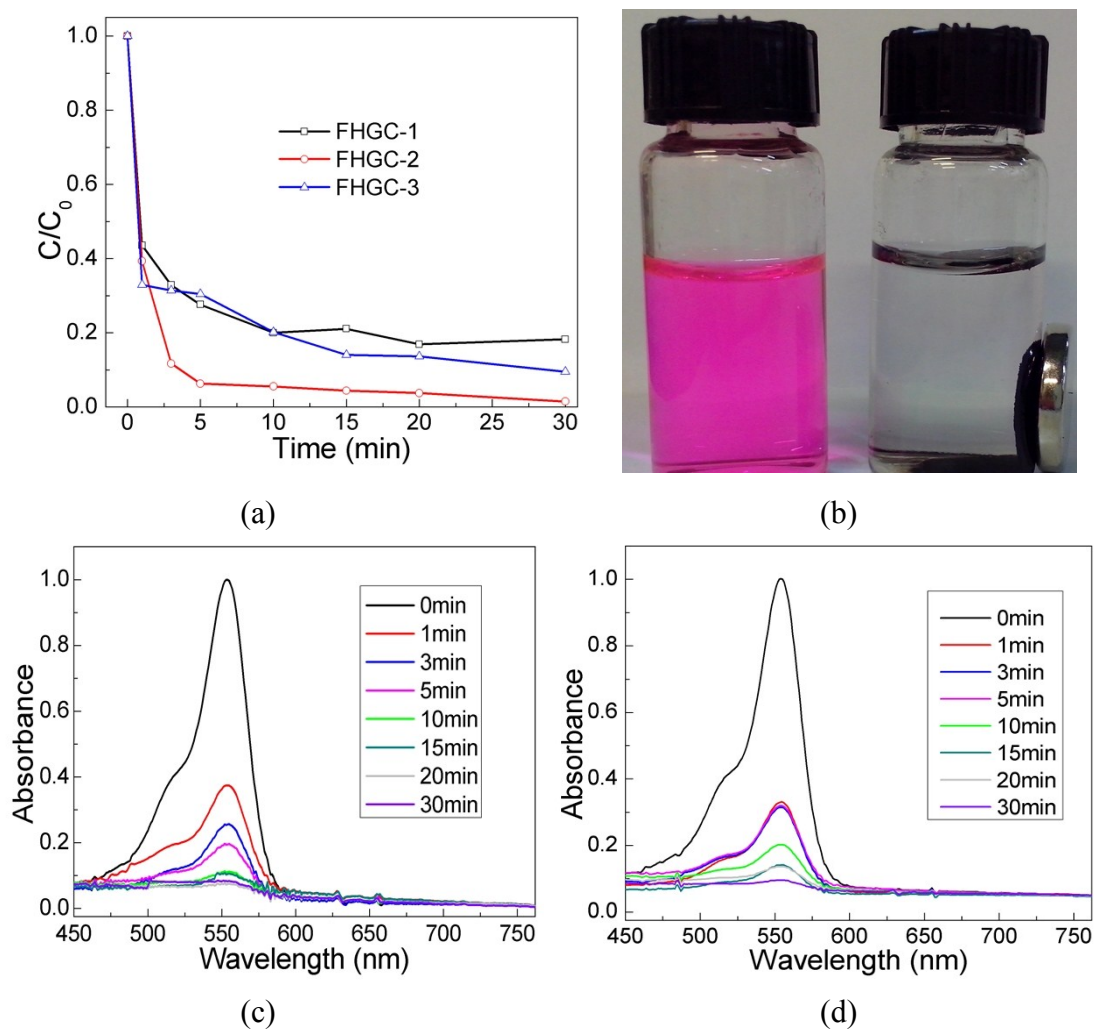

**Fig. S7.** (a)  $C/C_0$  versus time plots with FHGC-1, FHGC-2, and FHGC-3 at various times. (b) photograph for the RhB solution ( $1.0 \times 10^{-5}$  M, left) and for FHGC and RhB solution with applied magnetic field (right). (c) UV-vis spectra of the original RhB solution ( $1.0 \times 10^{-5}$  M, 20mL) and those after treatment with FHGC-1 (50 mg) at different times. (d) UV-vis spectra of the original RhB solution ( $1.0 \times 10^{-5}$  M, 20mL) and those after treatment with FHGC-3 (50 mg) at different times.



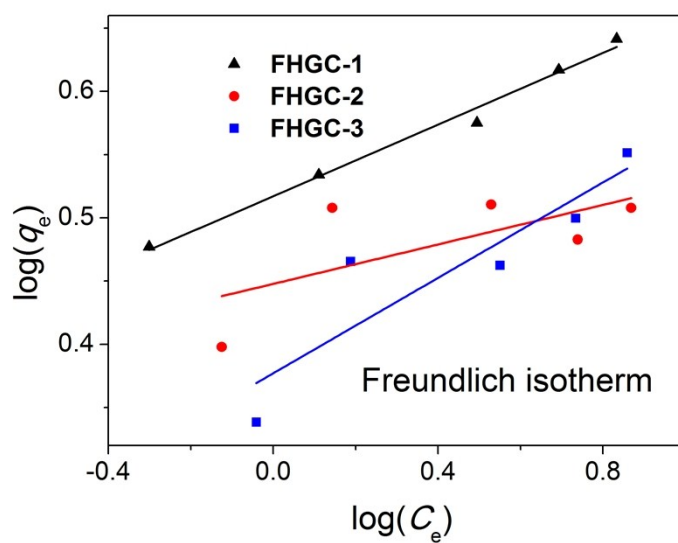

**Fig. S8.** Linearized Freundlich isotherm for As(V) adsorption of the FHGC-n (n = 1, 2, 3) samples.

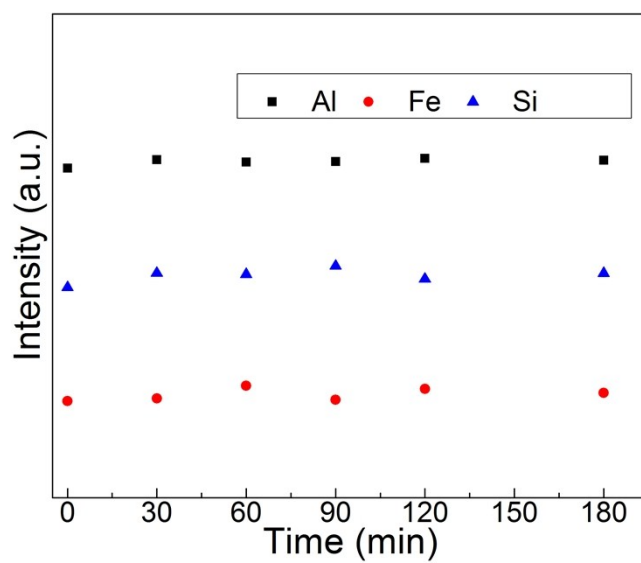

**Fig. S9.** Concentrations of Fe, Al, and Si during the adsorption process in the mixture system.

|                                           |                           |                                                           |       |
|-------------------------------------------|---------------------------|-----------------------------------------------------------|-------|
| FHGC-1                                    | As(V) Langmuir isotherm   | $q_m(\text{mg g}^{-1})$                                   | 4.42  |
|                                           |                           | $K_L(\text{L/mg})$                                        | 2.09  |
|                                           |                           | $R^2$                                                     | 0.957 |
|                                           | As(V) Freundlich isotherm | $n$                                                       | 7.06  |
|                                           |                           | $K_F(\text{mg}^{1-(1/n)} \text{ L}^{1/n} \text{ g}^{-1})$ | 3.29  |
| $R^2$                                     |                           | 0.985                                                     |       |
| FHGC-2                                    | As(V) Langmuir isotherm   | $q_m(\text{mg g}^{-1})$                                   | 3.23  |
|                                           |                           | $K_L(\text{L/mg})$                                        | 9.54  |
|                                           |                           | $R^2$                                                     | 0.996 |
| FHGC-3                                    | As(V) Langmuir isotherm   | $q_m(\text{mg g}^{-1})$                                   | 3.68  |
|                                           |                           | $K_L(\text{L/mg})$                                        | 1.37  |
|                                           |                           | $R^2$                                                     | 0.969 |
| parameters of arsenic adsorption kinetics |                           |                                                           |       |
| Sorbent                                   | isotherm constant         |                                                           | As(V) |
| FHGC-1                                    | $q_e$                     |                                                           | 3.70  |
|                                           | $k_2$                     |                                                           | 0.098 |
|                                           | $V_0$                     |                                                           | 1.34  |
|                                           | $R^2$                     |                                                           | 0.997 |
| FHGC-2                                    | $q_e$                     |                                                           | 2.78  |
|                                           | $k_2$                     |                                                           | 0.30  |
|                                           | $V_0$                     |                                                           | 2.33  |
|                                           | $R^2$                     |                                                           | 0.996 |
| FHGC-3                                    | $q_e$                     |                                                           | 2.59  |
|                                           | $k_2$                     |                                                           | 0.20  |
|                                           | $V_0$                     |                                                           | 1.37  |
|                                           | $R^2$                     |                                                           | 0.966 |

**Table S2.** Equilibrium adsorption isotherm fitting parameters for As(V) in cases FHGC-n (n = 1, 2, 3), and parameters of a pseudo-second-order kinetic model fitting arsenic adsorption kinetics in cases FHGC-n (n = 1, 2, 3).

## References

- S1. W. S. Hummers and R. E. Offeman, *J. Am. Chem. Soc.*, 1958, **80**, 1339–1339.
